# Supplementary material
Source: PubMed Central journal article supplement (PMC7296618)
Supplement: nz0c00645_si_001.pdf [file nz0c00645_si_001.pdf]

Supporting Information

**Recent Advances in Solar-driven Carbon Dioxide Conversion:  
Expectations vs. Reality**

*Jie He and Csaba Janáky\**

Department of Physical Chemistry and Materials Science, Interdisciplinary Excellence  
Centre, University of Szeged, Aradi Square 1., Szeged, H-6720, Hungary

\*janaky@chem.u-szeged.hu, twitter: @JanakyLab

**Table S1.** Products distribution data of PS/PC CO<sub>2</sub> conversion studies within different formation rate ranges. (n = 121)

| Products                           | Normalized formation rate (mmol e <sup>-</sup> g <sup>-1</sup> h <sup>-1</sup> ) |         |       |     |     |      |       |       |
|------------------------------------|----------------------------------------------------------------------------------|---------|-------|-----|-----|------|-------|-------|
|                                    | < 0.1                                                                            | 0.1–0.5 | 0.5–1 | 1–2 | 2–5 | 5–10 | 10–20 | 20–80 |
| CO                                 | 22                                                                               | 5       | 5     | 7   | 6   | 4    | --    | 3     |
| CH <sub>4</sub>                    | 9                                                                                | 20      | 2     | 3   | 3   | 2    | 3     | 1     |
| HCOOH                              | 1                                                                                | 3       | 2     | --  | --  | 1    | --    | --    |
| CH <sub>3</sub> OH                 | 3                                                                                | 3       | 2     | --  | 1   | --   | 2     | --    |
| CH <sub>3</sub> CH <sub>2</sub> OH | --                                                                               | --      | 1     | --  | --  | --   | --    | --    |
| CH <sub>3</sub> COOH               | 1                                                                                | 1       | --    | --  | 1   | --   | --    | --    |
| C <sub>2</sub> H <sub>6</sub>      | --                                                                               | 2       | --    | --  | --  | --   | 1     | --    |
| C <sub>3</sub> H <sub>8</sub>      | --                                                                               | --      | 1     | --  | --  | --   | --    | --    |

**Table S2.** Products distribution data of PEC CO<sub>2</sub> conversion studies within different Faradaic efficiency ranges. (n = 60)

| Products                           | Faradaic efficiency (%) |       |       |       |        |
|------------------------------------|-------------------------|-------|-------|-------|--------|
|                                    | 0–20                    | 20–40 | 40–60 | 60–80 | 80–100 |
| CO                                 | 4                       | 2     | 4     | 5     | 7      |
| HCOOH                              | 4                       | 2     | 3     | 5     | 9      |
| CH <sub>3</sub> OH                 | 2                       | --    | 3     | --    | 2      |
| CH <sub>4</sub>                    | 1                       | --    | 1     | 1     | --     |
| CH <sub>3</sub> CH <sub>2</sub> OH | 1                       | 1     | --    | --    | 1      |
| CH <sub>3</sub> COOH               | --                      | --    | --    | 2     | --     |

**Table S3.** Products distribution of PV + EC CO<sub>2</sub> conversion studies within different SFE ranges. (n = 19)

| Products                      | Solar-to-fuel conversion efficiency (%) |     |     |      |
|-------------------------------|-----------------------------------------|-----|-----|------|
|                               | 0–1                                     | 1–2 | 2–5 | 5–25 |
| CO                            | 2                                       | 1   | 4   | 7    |
| HCOOH                         | 2                                       | --  | 1   | --   |
| C <sub>2</sub> H <sub>4</sub> | --                                      | 1   | --  | --   |
| others                        | --                                      | --  | --  | 1    |
